# Supplementary material
Source: PubMed Central journal article supplement (PMC4335907)
Supplement: AAC.04759-14_zac002153715so1.pdf [file AAC.04759-14_zac002153715so1.pdf]

Supplemental table 1. Features of pKPI-6 ORFs (GenBank accession no. AB616660)

| ORF | Position (bp) |       | Strand | Gene                         | Length            |                                                                           | Description                                                          | Identity (%) | Overlap <sup>b</sup> |               | Function/product                                  |
|-----|---------------|-------|--------|------------------------------|-------------------|---------------------------------------------------------------------------|----------------------------------------------------------------------|--------------|----------------------|---------------|---------------------------------------------------|
|     | start         | stop  |        |                              | (aa) <sup>a</sup> | Source                                                                    |                                                                      |              | (aa)                 | Accession no. |                                                   |
| 1   | 1             | 720   | +      | <i>repA</i>                  | 239               | <i>K. pneumoniae</i> (plasmid 12)                                         | Initiator Replication protein                                        | 100          | 239/239              | YP_002286934  | Initiation of plasmid replication                 |
| 2   | 2417          | 2986  | -      | <i>resP</i>                  | 189               | <i>K. pneumoniae</i> subsp. <i>ozaenae</i> (pK06)                         | resolvase, Site-specific recombinases                                | 100          | 189/189              | AGW99991      | Resolvase                                         |
| 3   | 3379          | 4392  | -      | <i>intI1</i>                 | 337               | <i>Shigella flexneri</i> 2b (plasmid R100)                                | IntI (E2) integrases, site-specific tyrosine recombinases            | 100          | 337/337              | NP_052698     | Class 1 integrase                                 |
| 4   | 4494          | 5114  | +      | <i>aacA4'</i>                | 210               | uncultured bacterium (pKSP212)                                            | aminoglycoside (6')-N-acetyltransferase                              | 97           | 204/210              | ADC80806      | Aminoglycoside acetyltransferase                  |
| 5   | 5191          | 5931  | +      | <i>bla<sub>IMP-6</sub></i>   | 246               | <i>Serratia marcescens</i>                                                | metallo-β-lactamase                                                  | 100          | 246/246              | BAB15941      | Metallo-β-lactamase                               |
| 6   | 6076          | 6855  | +      | <i>aadA2</i>                 | 267               | Gammaproteobacteria                                                       | Streptomycin 3'-adenyltransferase                                    | 100          | 267/267              | WP_000729308  | Aminoglycoside adenytransferase                   |
| 7   | 6996          | 8111  | +      | <i>tnpA</i> of IS91 family   | 371               | <i>Psychromonas ossibalaenae</i>                                          | <i>tnpA</i> of IS91 family                                           | 55           | 198/359              | WP_019617277  | Transposase of IS91 family                        |
| 8   | 8481          | 8828  | +      | <i>qacEA1</i>                | 115               | <i>Citrobacter freundii</i> (pT-OXA-181)                                  | Quaternary ammonium compound resistance                              | 100          | 115/115              | AGE11240      | Quaternary ammonium compound resistance           |
| 9   | 8822          | 9661  | +      | <i>sulI</i>                  | 279               | <i>Shigella flexneri</i> 2b (plasmid R100)                                | dihydropteroate synthase                                             | 100          | 279/279              | NP_052895     | Dihydropteroate synthase                          |
| 10  | 9789          | 10289 | +      | <i>orf5</i>                  | 166               | <i>Desulfurispirillum indicum</i> S5                                      | GCN5-like N-acetyltransferase                                        | 100          | 166/166              | YP_004111325  | Unknown                                           |
| 11  | 10766         | 11560 | +      | <i>tnpA</i> of IS6100        | 264               | <i>E. coli</i> (pEK499)                                                   | transposase for insertion sequence IS6100                            | 100          | 264/264              | YP_003108355  | Transposase of IS6100                             |
| 12  | 11821         | 13035 | +      | <i>EcoRII</i>                | 404               | <i>K. pneumoniae</i> NK245 (pK245)                                        | N-terminal domain of type IIE restriction endonuclease <i>EcoRII</i> | 100          | 404/404              | YP_001966230  | Restriction endonuclease type II                  |
| 13  | 13069         | 14502 | -      | <i>EcoRIImet</i>             | 477               | <i>E. coli</i> (pMUR050)                                                  | DNA cytosine methylase                                               | 100          | 477/477              | YP_724464     | DNA methylase                                     |
| 14  | 14884         | 15090 | -      | hypothetical protein         | 68                | <i>K. pneumoniae</i> (plasmid 12)                                         | hypothetical protein                                                 | 100          | 68/68                | YP_002287015  | Unknown                                           |
| 15  | 15095         | 15604 | -      | <i>mrr</i>                   | 169               | <i>E. coli</i> (pNDM-BTR)                                                 | Restriction endonuclease                                             | 100          | 169/169              | YP_008574960  | Restriction endonuclease                          |
| 16  | 15792         | 16103 | -      | hypothetical protein         | 103               | <i>Salmonella typhimurium</i> (plasmid R46)                               | unknown                                                              | 100          | 103/103              | NP_511182     | Unknown                                           |
| 17  | 16139         | 16453 | -      | <i>kikA</i>                  | 104               | <i>K. pneumoniae</i> (plasmid 12)                                         | conjugal transfer protein TrbM                                       | 100          | 104/104              | YP_002287012  | Killing of <i>Klebsiella</i> during conjugation   |
| 18  | 16450         | 16794 | -      | hypothetical protein         | 114               | <i>K. pneumoniae</i> (plasmid 12)                                         | unknown                                                              | 100          | 114/114              | YP_002287011  | Unknown                                           |
| 19  | 16810         | 17115 | -      | <i>korB</i>                  | 101               | <i>E. coli</i> 517-2H1 (pLEW517)                                          | histone-like proteins of HNS family                                  | 100          | 101/101              | YP_001096375  | Initiation of kik mediated killing                |
| 20  | 17224         | 17958 | +      | <i>traL</i>                  | 244               | <i>K. pneumoniae</i> (plasmid 12)                                         | Lytic Transglycosylase                                               | 100          | 244/244              | YP_002287009  | Conjugal transfer                                 |
| 21  | 17955         | 18248 | +      | <i>korA</i>                  | 97                | <i>K. oxytoca</i> KOX105 (pKOX105)                                        | Initiation of kik mediated killing                                   | 100          | 97/97                | YP_003675738  | Initiation of kik mediated killing                |
| 22  | 18258         | 18551 | +      | <i>traM</i>                  | 97                | <i>K. pneumoniae</i> (plasmid 9)                                          | Conjugal transfer                                                    | 100          | 97/97                | YP_002286912  | Conjugal transfer                                 |
| 23  | 18601         | 18918 | +      | <i>traA</i>                  | 78                | <i>E. coli</i> L46 (pEC_L46)                                              | Type IV secretory pathway                                            | 100          | 78/78                | YP_003829295  | Conjugal transfer                                 |
| 24  | 18918         | 21518 | +      | <i>traB</i>                  | 866               | <i>K. pneumoniae</i> KP96 (pKP96)                                         | conjugal transfer protein                                            | 100          | 866/866              | YP_002332880  | Conjugal transfer                                 |
| 25  | 21536         | 22249 | +      | <i>traC</i>                  | 237               | <i>K. pneumoniae</i> (plasmid 9)                                          | Type IV secretion system proteins                                    | 100          | 237/237              | YP_002286909  | Conjugal transfer                                 |
| 26  | 22257         | 22484 | +      | <i>eex</i>                   | 75                | <i>E. coli</i> L46 (pEC_L46)                                              | entry exclusion protein                                              | 100          | 75/75                | YP_003829298  | Entry exclusion                                   |
| 27  | 22500         | 23540 | +      | <i>traD</i>                  | 346               | <i>K. pneumoniae</i> (plasmid 12)                                         | TrbL/VirB6 plasmid conjugal transfer protein                         | 100          | 346/346              | YP_002286993  | Conjugal transfer                                 |
| 28  | 23611         | 23769 | +      | <i>traN</i>                  | 52                | <i>K. pneumoniae</i> (plasmid 12)                                         | metallophosphatase superfamily                                       | 100          | 52/52                | YP_002286992  | Conjugal transfer                                 |
| 29  | 23759         | 24457 | +      | <i>traE</i>                  | 232               | <i>K. pneumoniae</i> (plasmid 9)                                          | VirB8 protein                                                        | 100          | 232/232              | YP_002286905  | Conjugal transfer                                 |
| 30  | 24468         | 25352 | +      | <i>traO</i>                  | 294               | <i>E. coli</i> L46 (pEC_L46)                                              | type IV conjugative transfer system protein                          | 100          | 294/294              | YP_003829302  | Conjugal transfer                                 |
| 31  | 25352         | 26512 | +      | <i>traF</i>                  | 386               | <i>Photobacterium damsela</i> subsp. <i>piscicida</i> PT99-018 (pP99-018) | Bacterial conjugation TrbI-like protein                              | 100          | 386/386              | YP_908595     | Conjugal transfer                                 |
| 32  | 26554         | 27549 | +      | <i>traG</i>                  | 331               | <i>E. coli</i> (pMUR050)                                                  | conjugation                                                          | 100          | 331/331              | YP_724501     | Conjugal transfer                                 |
| 33  | 27549         | 28082 | +      | <i>nuc</i>                   | 177               | <i>K. oxytoca</i> E718 (pKOX_R1)                                          | endonuclease                                                         | 100          | 177/177              | YP_006501590  | Periplasmic endonuclease                          |
| 34  | 28256         | 28750 | -      | <i>ΔfipA</i> (1)             |                   | <i>E. coli</i> 345-2RfC (plasmid N3)                                      | fertility inhibition of IncP plasmids protein                        |              |                      | YP_004558188  | Fertility inhibition of IncP plasmids (truncated) |
| 35  | 29019         | 29261 | +      | <i>relaxase</i>              | 80                | <i>E. coli</i> A2363 (pAPEC-O2-R)                                         | relaxase                                                             | 100          | 80/80                | YP_190207     | Unknown                                           |
| 36  | 29293         | 29919 | +      | <i>tetR</i>                  | 208               | <i>Providencia stuartii</i> MRSN 2154 (pMR0211)                           | tetracycline repressor protein                                       | 100          | 208/208              | YP_005351739  | tetracycline resistant regulatory protein         |
| 37  | 30049         | 31248 | +      | <i>tetA</i>                  | 399               | <i>K. pneumoniae</i> KP96 (pKP96)                                         | tetracycline resistance protein                                      | 100          | 399/399              | YP_002332890  | tetracycline resistant protein A                  |
| 38  | 31280         | 31978 | -      | <i>pecM</i>                  | 232               | <i>E. coli</i> (pHKU1)                                                    | EamA-like transporter family                                         | 100          | 232/232              | YP_008574853  | Unknown                                           |
| 39  | 32165         | 32301 | -      | <i>ΔfipA</i> (2)             |                   | <i>E. coli</i> 345-2RfC (plasmid N3)                                      | fertility inhibition of IncP plasmids protein                        |              |                      | YP_004558188  | Fertility inhibition of IncP plasmids (truncated) |
| 40  | 32301         | 35543 | -      | <i>traI</i>                  | 1080              | <i>K. pneumoniae</i> KP96 (pKP96)                                         | conjugal transfer protein                                            | 100          | 1080/1080            | YP_002332893  | Conjugal transfer                                 |
| 41  | 35543         | 37072 | -      | <i>traJ</i>                  | 509               | <i>K. pneumoniae</i> KP96 (pKP96)                                         | conjugal transfer protein                                            | 100          | 509/509              | YP_002332894  | Conjugal transfer                                 |
| 42  | 37074         | 37490 | -      | <i>traK</i>                  | 138               | <i>K. pneumoniae</i> (plasmid 12)                                         | conjugal transfer protein                                            | 100          | 138/138              | YP_002286951  | Conjugal transfer                                 |
| 43  | 38020         | 38400 | +      | <i>stbA</i>                  | 126               | <i>K. pneumoniae</i> (plasmid 12)                                         | prevention of the induction of SOS-responses                         | 99           | 125/126              | YP_002286950  | Prevention of SOS response                        |
| 44  | 38409         | 39125 | +      | <i>stbB</i>                  | 238               | <i>K. pneumoniae</i> (plasmid 12)                                         | plasmid stability protein                                            | 100          | 238/238              | YP_002286949  | Stable plasmid inheritance                        |
| 45  | 39127         | 39495 | +      | <i>stbC</i>                  | 122               | <i>Salmonella typhimurium</i> (plasmid R46)                               | stable plasmid inheritance                                           | 100          | 122/122              | NP_511206     | Stable plasmid inheritance                        |
| 46  | 39677         | 40021 | +      | <i>orfD</i>                  | 114               | <i>Salmonella typhimurium</i> (plasmid R46)                               | hypothetical protein                                                 | 100          | 114/114              | NP_511207     | Unknown                                           |
| 47  | 40132         | 40452 | -      | <i>cagAII</i>                | 106               | <i>K. pneumoniae</i> (plasmid 12)                                         | member of CUP-controlled regulon; similar to RecX                    | 100          | 106/106              | YP_002286945  | Prevention of RecA overproduction                 |
| 48  | 40530         | 40769 | -      | <i>cagEIII</i>               | 79                | <i>Salmonella typhimurium</i> (plasmid R46)                               | member of CUP-controlled regulon                                     | 100          | 79/79                | NP_511213     | Unknown                                           |
| 49  | 40779         | 41183 | -      | <i>ardR</i>                  | 134               | <i>E. coli</i> L46 (pEC_L46)                                              | antirestriction protein                                              | 100          | 134/134              | YP_003829321  | Regulation of <i>cag</i> genes                    |
| 50  | 41241         | 41666 | -      | <i>ardB</i>                  | 141               | <i>E. coli</i> L46 (pEC_L46)                                              | Antirestriction protein                                              | 100          | 141/141              | YP_003829320  | Inhibition of host type I restriction enzymes     |
| 51  | 42348         | 43223 | -      | <i>bla<sub>CTX-M-2</sub></i> | 291               | <i>Salmonella enterica</i> subsp. <i>enterica</i> serovar Typhimurium     | Beta-lactamase                                                       | 100          | 291/291              | P74841        | Extended-spectrum-β-lactamase                     |
| 52  | 43480         | 44742 | -      | <i>tnpA</i>                  | 420               | <i>E. coli</i> L46 (pEC_L46)                                              | IS <i>Ecp1</i> transposase                                           | 100          | 420/420              | YP_003829282  | Transposase of IS <i>Ecp1</i>                     |
| 53  | 45005         | 45379 | +      | <i>ΔmucB</i>                 | 124               | <i>K. pneumoniae</i>                                                      | DNA polymerase V subunit                                             | 99           | 123/124              | WP_020320119  | UV protection (truncated)                         |
| 54  | 45494         | 46321 | +      | <i>mpr</i>                   | 275               | <i>K. oxytoca</i> KOX105 (pKOX105)                                        | zinc metalloproteinase                                               | 100          | 275/275              | YP_003675760  | Unknown                                           |
| 55  | 46336         | 46677 | -      | <i>ardK</i>                  | 113               | <i>Salmonella typhimurium</i> (plasmid R46)                               | control of expression of genes fused to CUP sequences                | 100          | 113/113              | NP_511219     | Regulation of <i>cag</i> genes                    |
| 56  | 46761         | 46952 | -      | hypothetical protein         | 63                | Enterobacteriaceae                                                        | unknown                                                              | 100          | 63/63                | WP_016750023  | Unknown                                           |

<sup>a</sup> aa, amino acids.<sup>b</sup> Overlap indicates the number of overlapping amino acids/total number of amino acids.

Supplemental table 2. Primers used in this study.

| Primer set No.             | Primer                               | Sequence                                                            | Amplicon size (bp) | References                                                        |
|----------------------------|--------------------------------------|---------------------------------------------------------------------|--------------------|-------------------------------------------------------------------|
| For PCR scanning of In722  |                                      |                                                                     |                    |                                                                   |
| A                          | intl1-1014R<br>intl1-F               | CTACCTCTCACTAGTGAGGG<br>GCATCCTCGGTTTTCTGG                          | 644                | Kouda <i>et al.</i><br>Kouda <i>et al.</i>                        |
| B                          | intl1-501R<br>aac6'lb-R<br>aac6'lb-F | CACGATGATCGTGCCGTGAT<br>CCCAAGCCTTTGCCAGTTG<br>GAGTGGTGGGGCGGAGAAGA | 1009               | Kouda <i>et al.</i><br>Kouda <i>et al.</i><br>Kouda <i>et al.</i> |
| C                          | imp-6-500R                           | GGCAACCAAACCACTACGTT                                                | 1038               | this study                                                        |
| D                          | imp-1-381F<br>aadA2-447R             | CGGTAAGGTTCAAGCCACAA<br>AGCTTCAAGGTTTCCCTC                          | 1009               | Kouda <i>et al.</i><br>this study                                 |
| E                          | aadA2-212F<br>transposase-315R       | AATTTCGAACCAACTATCAGAG<br>AAAGACTCCGCAGAGATG                        | 1083               | this study<br>this study                                          |
| F                          | transposase-81F<br>tamspase-1241R    | TTCACCATCAAGTGTAGCTG<br>GCCGCTATTCGTTCTGTG                          | 1153               | this study<br>this study                                          |
| G                          | transposase-569F<br>qacEdelta1-R     | GCGTCGCTAAATATTTAGCTC<br>AGCAATTATGAGCCCATAC                        | 1043               | this study<br>Kouda <i>et al.</i>                                 |
| H                          | qacEdelta1-269F<br>sul1-527R         | GTATGGGGCTCATAATTGCT<br>ATCCCGGATCGAGGATGAG                         | 600                | Kouda <i>et al.</i><br>Kouda <i>et al.</i>                        |
| I                          | sul1-435F<br>orf5-107R               | GCTCGACGAGATTGTGCGGT<br>GTTCCCTTGGCGGACATCCA                        | 640                | Kouda <i>et al.</i><br>Kouda <i>et al.</i>                        |
| J                          | sul1-815F<br>orf5-R                  | GAGACCGAGGGTTAGATCAT<br>ATTTGAGTTCTAGGCGTTC                         | 650                | Kouda <i>et al.</i><br>Kouda <i>et al.</i>                        |
| For PCR scanning of pKPI-6 |                                      |                                                                     |                    |                                                                   |
| 1                          | repA-40F<br>resP-51F                 | GTCTAACGAGCTTACCGAAG<br>CCAGGTTGACGAACTAACAA                        | 2898               | Aurora <i>et al.</i><br>this study                                |
| 2                          | resP-237R<br>imp-1-500R              | TAATGACTTGACCCAATGAAC<br>GGCAGCCAAACCACTACGTT                       | 2942               | this study<br>Kouda <i>et al.</i>                                 |
| 3                          | imp-1-381F<br>qacEdelta1-R           | CGGTAAGGTTCAAGCCACAA<br>AGCAATTATGAGCCCATAC                         | 3259               | Kouda <i>et al.</i><br>Kouda <i>et al.</i>                        |
| 4                          | qacEdelta1-269F<br>IS6100-631R       | GTATGGGGCTCATAATTGCT<br>ATCCCTTGATCGTGGCATAG                        | 2639               | Kouda <i>et al.</i><br>this study                                 |
| 5                          | Sul815F<br>EcoRIIm1325F              | GAGACCGAGGGTTAGATCAT<br>AGTTCGGTAACTCCGTAGTGG                       | 3703               | Kouda <i>et al.</i><br>this study                                 |
| 6                          | EcoRII-686F<br>kikA-248F             | TTCTATTGGTTGAGGAACTGC<br>GCGAAGGTGGAAGTAACCAG                       | 3701               | this study<br>this study                                          |
| 7                          | mrr-kikA-F<br>traL-593R              | CCATAGAATAAGGTTTTCTGTAGTG<br>CCCTTCGCTGTTTCTGTCT                    | 2254               | this study<br>this study                                          |
| 8                          | traL-173F<br>traB-2574R              | ATAATTTAGTGGGCCTGGGTC<br>GAGCCATACTTCAGGGTC                         | 3961               | this study<br>this study                                          |
| 9                          | traB-2360F<br>traO-305R              | TGTCGATTACCGAACACTC<br>ATCACCAGGTTGGTATCACTC                        | 3476               | this study<br>this study                                          |
| 10                         | traE516F<br>nuc526R                  | AGCAACGATACGCTTTACTAC<br>TGGAACGGTAGTCTCTCC                         | 3806               | this study<br>this study                                          |
| 11                         | nuc-321F<br>tetA-888R                | TACTGACAGTGATTTCCCTATCC<br>GAAGGCAAGCAGGATGTAGC                     | 3068               | this study<br>this study                                          |
| 12                         | tetR-179R<br>tral-1110F              | ACCGAATGCGTATGATTCTC<br>ACCTGAAGGCGGTACAGAAG                        | 4258               | this study<br>this study                                          |
| 13                         | tral-1773R<br>traK-286F              | GCGAGCGTTATGCTTCTC<br>TGCATGAATCACTCGCTATTG                         | 3434               | this study<br>this study                                          |
| 14                         | traJ-135R<br>cagAII-195F             | TAACCAGATACGGAATCAGG<br>ATTTGACTATCTGACCCAAGAC                      | 3322               | this study<br>this study                                          |
| 15                         | cagAII-282R<br>ISEcpl-470F           | ATTACGCTCAATACCGTGG<br>CCTAAGAACTGGGAAACCG                          | 4122               | this study<br>this study                                          |
| 16                         | ISEcpl-1117R<br>repA-553R            | AGTCCAAGGAATCAAACCTTG<br>ACGGTCATTTAACCAAGCATG                      | 4163               | this study<br>Aurora <i>et al.</i>                                |

Supplemental table 3. Result of susceptibility testing

| Strain               | Name   | Place      | Year | ABPC | PIPC | CEZ | CAZ | CPR | CMZ | CPDX | AZT | IPM  | MEPM | A/C | C/S | P/T | AMK | GM | MINO | CPFX  | IPM <sup>#</sup> | MEPM <sup>#</sup> | PAPM <sup>#</sup> | BIPM <sup>#</sup> | DRPM <sup>#</sup> |
|----------------------|--------|------------|------|------|------|-----|-----|-----|-----|------|-----|------|------|-----|-----|-----|-----|----|------|-------|------------------|-------------------|-------------------|-------------------|-------------------|
| <i>K. pneumoniae</i> | a26    | Hiroshima  | 2009 | >16  | >64  | >16 | >16 | >16 | >32 | >4   | >16 | 1    | >8   | 16  | >32 | ≤16 | ≤4  | 4  | >8   | >2    | 1                | 32                | 1                 | 1                 | 32                |
| <i>K. pneumoniae</i> | MS5263 | Amagasaki  | 2011 | >16  | >64  | >16 | >16 | >16 | >32 | >4   | >16 | 2    | >8   | >16 | >32 | >64 | ≤4  | >8 | >8   | ≤0.25 | 2                | 256               | 8                 | 2                 | 256               |
| <i>K. pneumoniae</i> | MS5265 | Amagasaki  | 2011 | >16  | >64  | >16 | 16  | >16 | >32 | >4   | 16  | ≤0.5 | 8    | 16  | >32 | ≤16 | ≤4  | 2  | 8    | >2    | 0.25             | 32                | 0.5               | ≤0.125            | 64                |
| <i>K. pneumoniae</i> | MS5266 | Amagasaki  | 2011 | >16  | >64  | >16 | 16  | >16 | >32 | >4   | 8   | 2    | >8   | 16  | >32 | ≤16 | 8   | 2  | 8    | ≤0.25 | 1                | 32                | 2                 | 1                 | 64                |
| <i>K. pneumoniae</i> | MS5283 | Kinki area | 2006 | >16  | >64  | >16 | >16 | >16 | >32 | >4   | >16 | 2    | >8   | >16 | >32 | >64 | ≤4  | >8 | >8   | ≤0.25 | 2                | 128               | 8                 | 0.5               | 128               |
| <i>K. pneumoniae</i> | MS5287 | Kinki area | 2008 | >16  | >64  | >16 | 16  | >16 | >32 | >4   | 4   | ≤0.5 | 8    | 16  | >32 | ≤16 | ≤4  | 4  | 8    | >2    | 0.5              | 32                | 1                 | 1                 | 32                |
| <i>K. pneumoniae</i> | MS5288 | Kinki area | 2009 | >16  | >64  | >16 | 8   | >16 | 32  | >4   | 8   | ≤0.5 | >8   | 8   | 32  | ≤16 | ≤4  | 4  | 4    | ≤0.25 | 0.5              | 16                | 0.5               | 0.5               | 8                 |
| <i>K. pneumoniae</i> | MS5289 | Kinki area | 2010 | >16  | >64  | >16 | >16 | >16 | >32 | >4   | >16 | 1    | >8   | 16  | >32 | ≤16 | ≤4  | 4  | 8    | >2    | 1                | 32                | 1                 | 0.5               | 32                |
| <i>K. pneumoniae</i> | MS5290 | Kinki area | 2010 | >16  | >64  | >16 | >16 | >16 | >32 | >4   | 16  | 1    | >8   | 16  | >32 | ≤16 | ≤4  | 8  | 4    | >2    | 1                | 64                | 4                 | 2                 | 32                |
| <i>K. pneumoniae</i> | MS5291 | Kinki area | 2010 | >16  | 16   | >16 | >16 | ≤8  | >32 | >4   | ≤1  | 2    | >8   | 16  | >32 | ≤16 | ≤4  | 4  | 8    | >2    | 1                | 128               | 8                 | 4                 | 64                |
| <i>K. pneumoniae</i> | MS5292 | Kinki area | 2010 | >16  | >64  | >16 | 4   | >16 | 32  | >4   | 4   | 1    | >8   | 8   | >32 | ≤16 | ≤4  | 4  | 4    | ≤0.25 | 0.5              | 16                | 0.5               | 0.5               | 8                 |
| <i>K. pneumoniae</i> | MS5293 | Kinki area | 2009 | >16  | >64  | >16 | >16 | >16 | >32 | >4   | >16 | 1    | >8   | >16 | >32 | ≤16 | ≤4  | 2  | >8   | >2    | 0.5              | 32                | 1                 | 1                 | 16                |
| <i>K. pneumoniae</i> | MS5294 | Kinki area | 2009 | >16  | >64  | >16 | >16 | >16 | >32 | >4   | >16 | ≤0.5 | >8   | 16  | >32 | ≤16 | ≤4  | 4  | 4    | >2    | 2                | 32                | 4                 | 0.25              | 32                |
| <i>K. pneumoniae</i> | MS5295 | Kinki area | 2010 | >16  | >64  | >16 | >16 | >16 | >32 | >4   | 16  | ≤0.5 | >8   | 16  | >32 | ≤16 | ≤4  | 4  | 4    | >2    | 1                | 32                | 2                 | 0.5               | 32                |
| <i>K. oxytoca</i>    | MS5282 | Kinki area | 2009 | >16  | >64  | >16 | >16 | >16 | >32 | >4   | >16 | 1    | >8   | 16  | >32 | ≤16 | 8   | 8  | >8   | >2    | 0.5              | 32                | 1                 | 0.25              | 16                |
| <i>E. coli</i>       | MS5264 | Amagasaki  | 2011 | >16  | >64  | >16 | >16 | >16 | >32 | >4   | >16 | 1    | >8   | >16 | >32 | >64 | ≤4  | >8 | 2    | >2    | 0.5              | 32                | 1                 | 0.25              | 64                |
| <i>E. coli</i>       | MS5267 | Amagasaki  | 2011 | >16  | >64  | >16 | 16  | >16 | >32 | >4   | >16 | 1    | 8    | 16  | >32 | ≤16 | 8   | 8  | 8    | >2    | 0.25             | 8                 | 0.25              | 0.25              | 4                 |
| <i>E. coli</i>       | MS5275 | Kinki area | 2006 | >16  | >64  | >16 | >16 | >16 | >32 | >4   | >16 | 1    | >8   | 16  | >32 | ≤16 | ≤4  | ≤1 | 4    | >2    | 0.25             | 16                | 0.5               | ≤0.125            | 8                 |
| <i>E. coli</i>       | MS5276 | Kinki area | 2006 | >16  | >64  | >16 | >16 | >16 | >32 | >4   | >16 | 1    | >8   | >16 | >32 | ≤16 | ≤4  | ≤1 | >8   | >2    | 0.5              | 16                | 0.5               | ≤0.125            | 8                 |
| <i>E. coli</i>       | MS5277 | Kinki area | 2009 | >16  | >64  | >16 | 16  | >16 | >32 | >4   | >16 | 1    | >8   | 16  | >32 | ≤16 | ≤4  | 4  | 4    | 0.5   | 0.5              | 16                | 1                 | ≤0.125            | 8                 |
| <i>E. coli</i>       | MS5278 | Kinki area | 2010 | >16  | >64  | >16 | 8   | >16 | >32 | >4   | >16 | 1    | 8    | 16  | >32 | ≤16 | ≤4  | 8  | 2    | ≤0.25 | 0.25             | 2                 | ≤0.125            | ≤0.125            | 1                 |

Susceptibility tests were performed by MicroScan WalkAway (Siemens Healthcare Diagnostics, Tokyo, Japan), NMIC6.31J.

# Susceptibility tests were performed by the microdilution method (7).

ABPC; Ampicillin, PIPC; Piperacillin, CEZ; Cefazolin, CAZ; Ceftazidime, CPR; Cefpirome, CMZ; Cefmetazole, CPDX; Cefpodoxime, AZT; Aztreonam, IPM; Imipenem, MEPM; Meropenem, A/C; Amoxicillin/Clavulanate, C/S; Cefoperazone/Sulbactam, P/T; Piperacillin/Tazobactam, AMK; Amikacin, GM; Gentamicin, MINO; Minocycline, CPFX; Ciprofloxacin, PAPM; Panipenem, BIPM; Biapenem, DRPM; Doripenem
